# Supplementary material for: The effect of confinement on the phase behavior of propane in nanoporous media: an experimental study probing capillary condensation, evaporation, and hysteresis at varying pore sizes and temperatures
Source: Royal Society of Chemistry journal article supplement (doi:10.1039/d3cp04378a), 2023-12-30
Supplement: d3cp04378a1.pdf [file d3cp04378a1.pdf]

**Supplementary Information for:**

**The effect of confinement on the phase behavior of  
propane in nanoporous media: An experimental study  
probing capillary condensation, evaporation, and  
hysteresis at varying pore sizes and temperatures**

*Rami M. Alloush, Keerti Vardhan Sharma\*, and Mohammad Piri*

Center of Innovation for Flow through Porous Media, Department of Energy and Petroleum  
Engineering, University of Wyoming, Laramie, Wyoming 82071, USA

KEYWORDS: Capillary Condensation; Confined Fluids; Propane; Nanopores; MCM-41

## Supporting Information

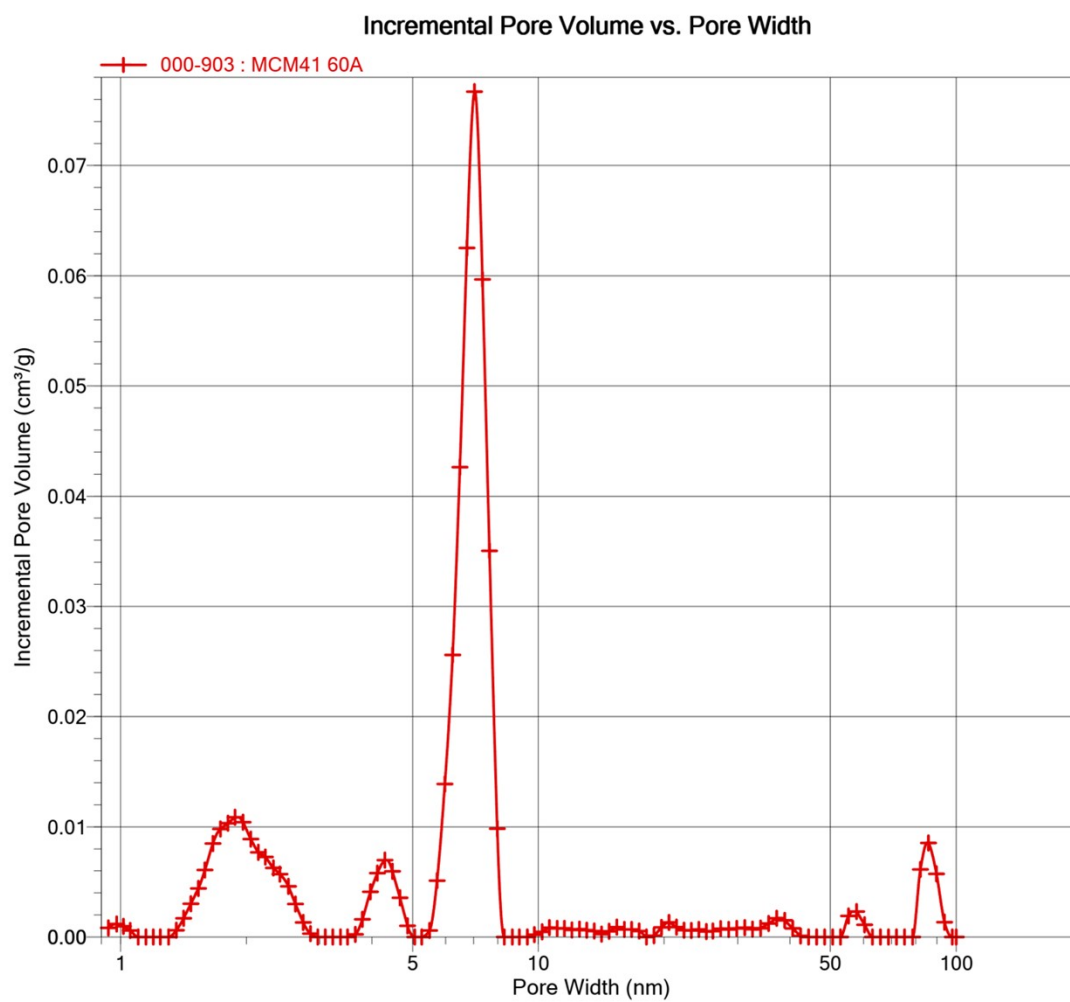

**Figure S1.** Incremental pore volume vs. pore width for MCM-41 60Å

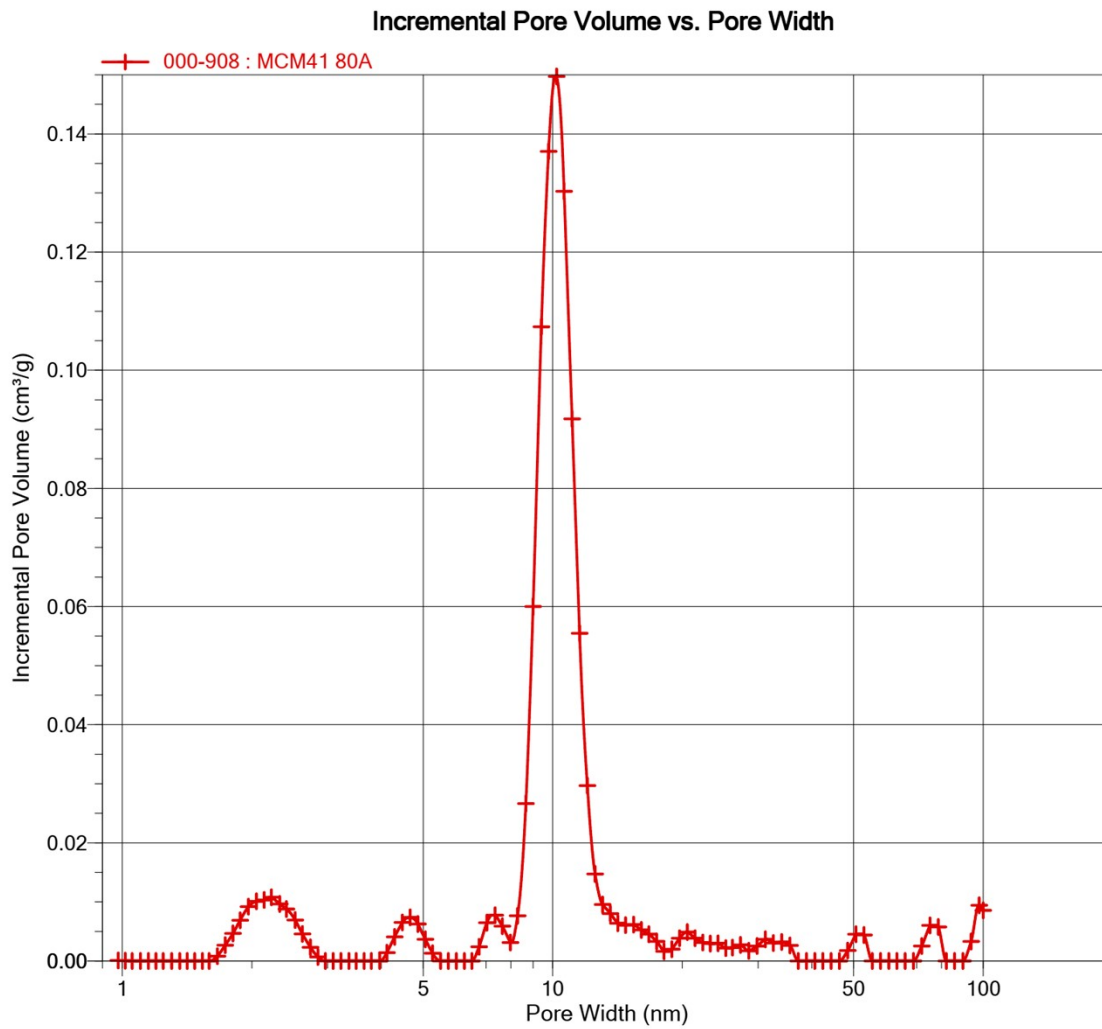

**Figure S2.** Incremental pore volume vs. pore width for MCM-41 80Å

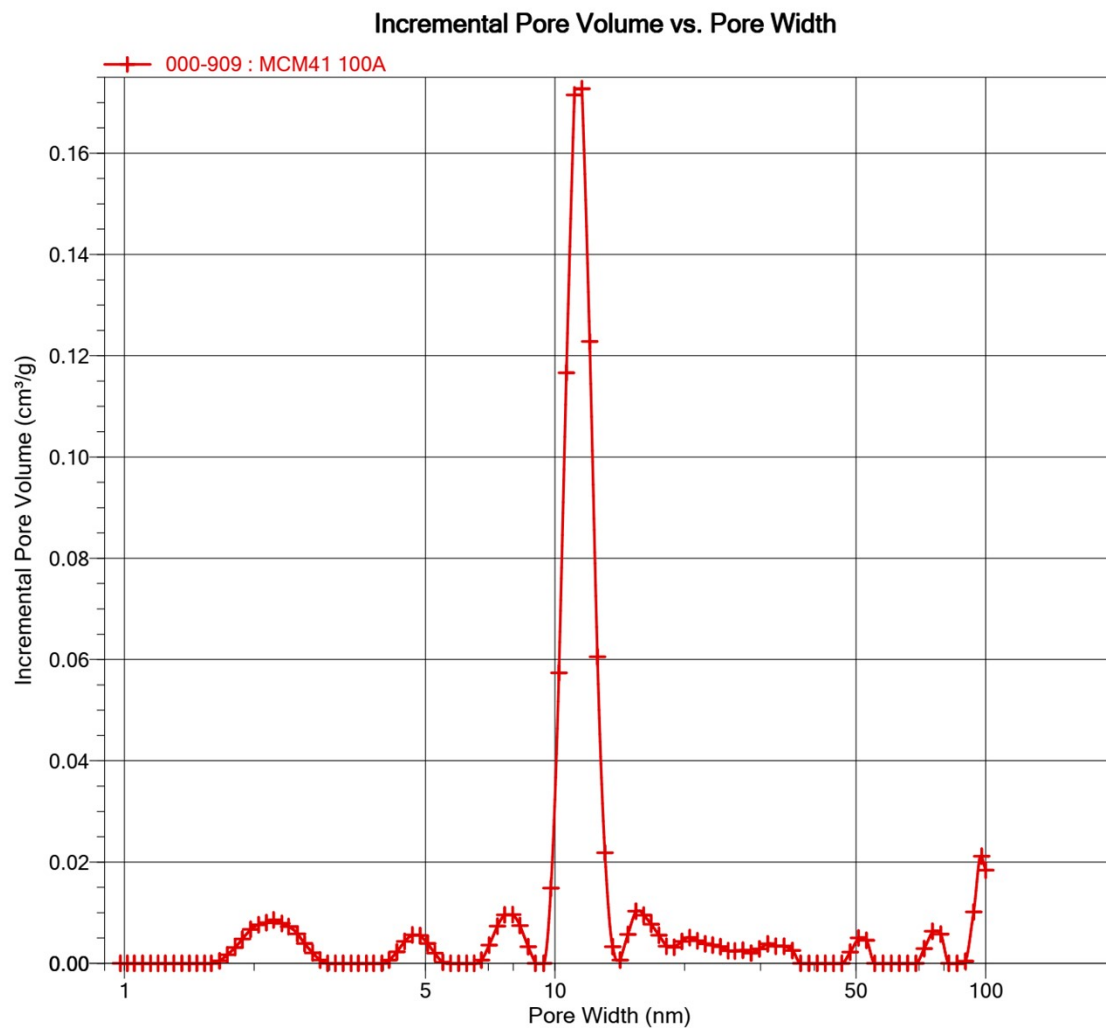

**Figure S3.** Incremental pore volume vs. pore width for MCM-41 100Å

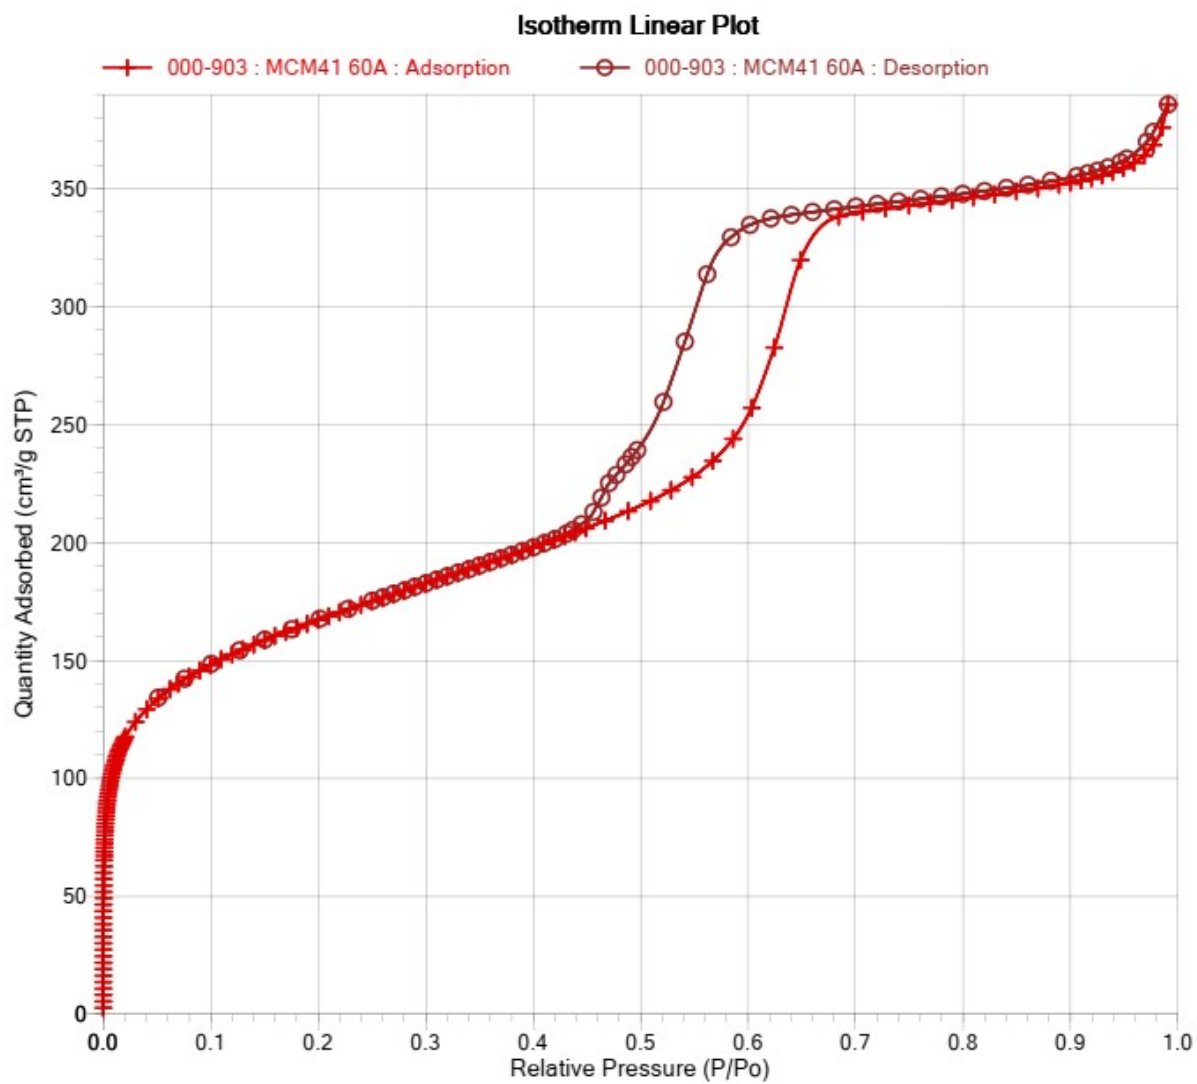

**Figure S4.** Isotherm Linear Plot for MCM-41 60Å showing Quantity Adsorbed (cm<sup>3</sup>/g STP) vs Relative Pressure (P/P<sub>0</sub>)

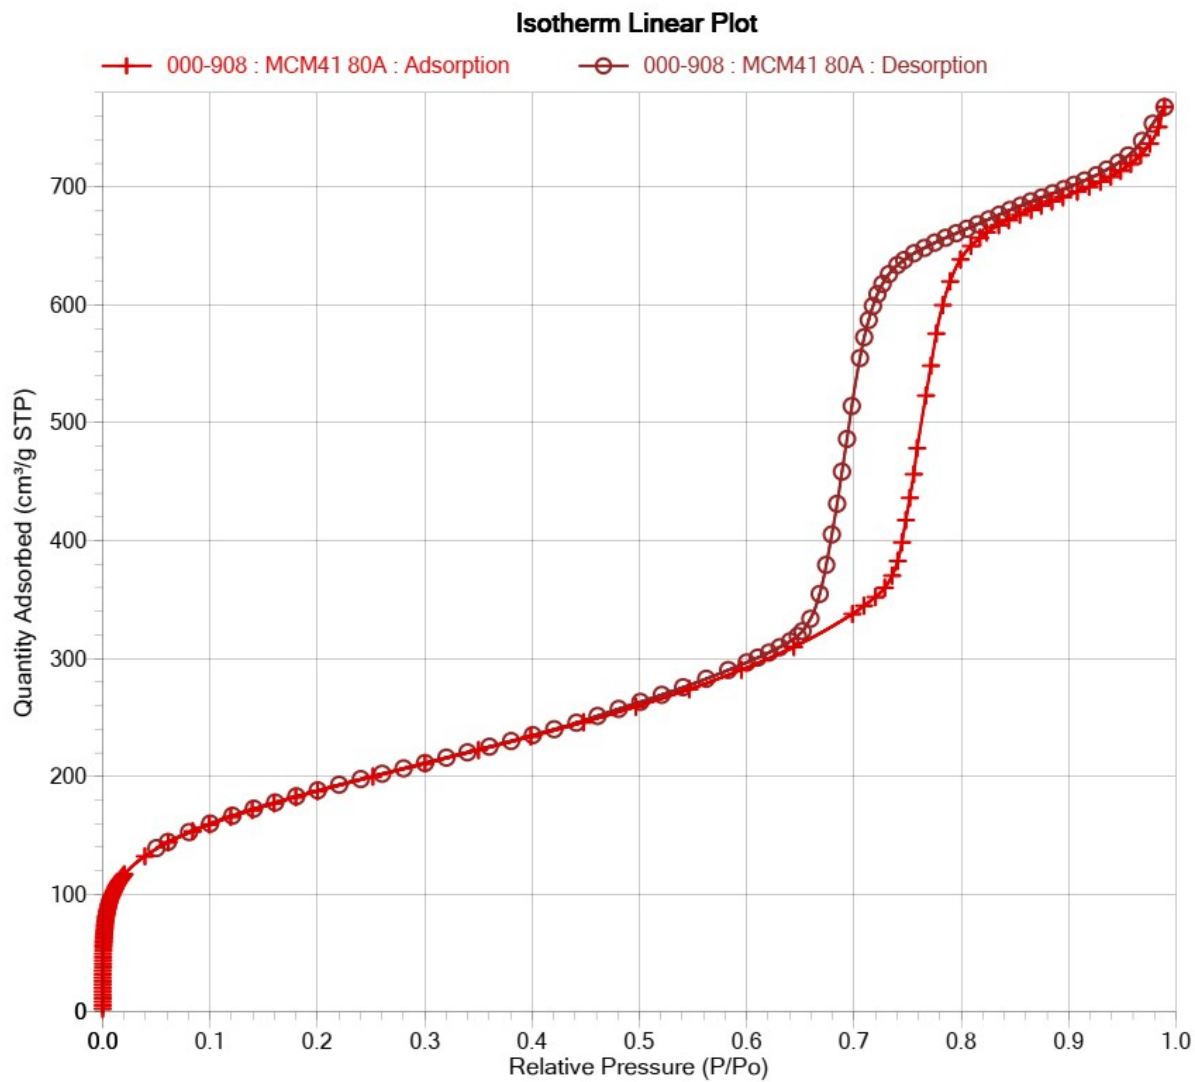

**Figure S5.** Isotherm Linear Plot for MCM-41 80Å showing Quantity Adsorbed (cm<sup>3</sup>/g STP) vs Relative Pressure (P/Po)

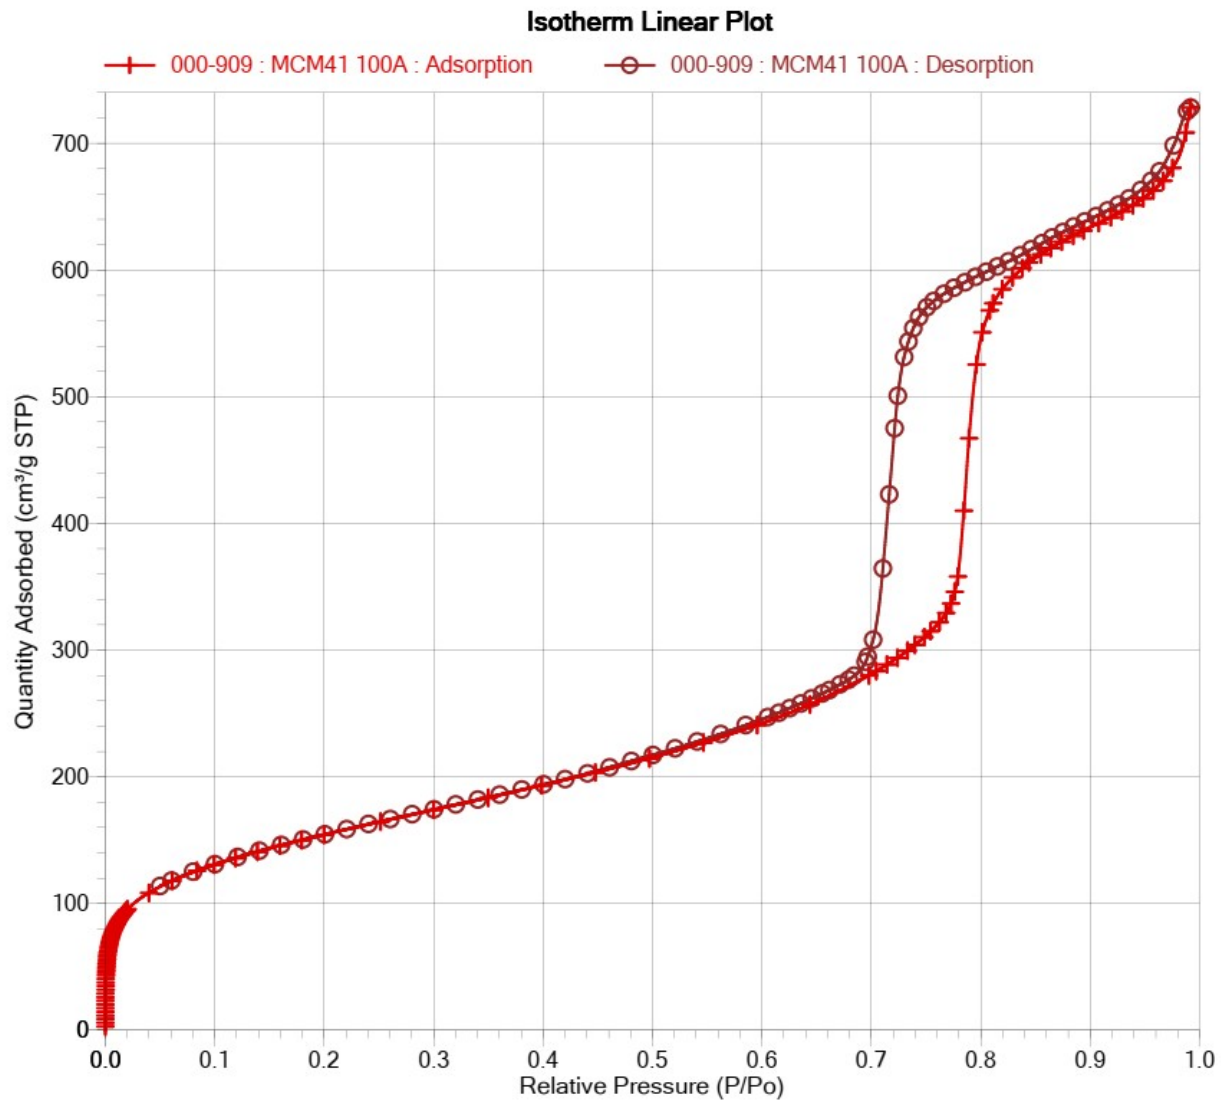

**Figure S6.** Isotherm Linear Plot for MCM-41 100Å showing Quantity Adsorbed (cm<sup>3</sup>/g STP) vs Relative Pressure (P/Po)

**Table S1.** Experimentally measured values of pressure and mass during adsorption of Propane in MCM-41 at -27°C.

| 60 Å     |       | 80 Å     |       | 100 Å    |       |
|----------|-------|----------|-------|----------|-------|
| Pressure | Mass  | Pressure | Mass  | Pressure | Mass  |
| (bar)    | (g)   | (bar)    | (g)   | (bar)    | (g)   |
| 0.127    | 0.000 | 0.066    | 0.000 | 0.112    | 0.000 |
| 0.150    | 0.233 | 0.187    | 0.231 | 0.211    | 0.197 |
| 0.207    | 0.473 | 0.445    | 0.473 | 0.409    | 0.331 |
| 0.335    | 0.696 | 0.734    | 0.704 | 0.656    | 0.504 |
| 0.537    | 0.931 | 1.018    | 0.929 | 0.896    | 0.690 |
| 0.786    | 1.151 | 1.234    | 1.174 | 1.123    | 0.869 |
| 1.001    | 1.375 | 1.350    | 1.367 | 1.291    | 1.045 |
| 1.135    | 1.594 | 1.377    | 1.632 | 1.389    | 1.208 |
| 1.206    | 2.070 | 1.411    | 2.110 | 1.434    | 1.379 |
| 1.238    | 2.302 | 1.431    | 2.332 | 1.462    | 1.574 |
| 1.458    | 2.525 | 1.468    | 2.580 | 1.467    | 1.735 |
| 1.872    | 2.738 | 1.623    | 2.808 | 1.471    | 1.931 |
| 1.910    | 2.885 | 1.826    | 3.042 | 1.488    | 2.304 |
| 1.922    | 2.973 | 1.854    | 3.115 | 1.533    | 2.451 |
|          |       | 1.864    | 3.146 | 1.655    | 2.647 |
|          |       | 1.868    | 3.187 | 1.804    | 2.817 |
|          |       | 1.876    | 3.256 | 1.873    | 3.007 |
|          |       | 1.885    | 3.340 | 1.895    | 3.171 |
|          |       |          |       | 1.908    | 3.325 |

**Table S2.** Experimentally measured values of pressure and mass during desorption of Propane in MCM-41 at -27°C.

| 60 Å     |       | 80 Å     |       | 100 Å    |       |
|----------|-------|----------|-------|----------|-------|
| Pressure | Mass  | Pressure | Mass  | Pressure | Mass  |
| (bar)    | (g)   | (bar)    | (g)   | (bar)    | (g)   |
| 1.792    | 3.013 | 1.771    | 3.271 | 1.761    | 3.065 |
| 1.784    | 2.938 | 1.761    | 3.250 | 1.761    | 3.017 |
| 1.749    | 2.763 | 1.757    | 3.196 | 1.748    | 2.965 |
| 1.719    | 2.705 | 1.742    | 3.128 | 1.745    | 2.918 |
| 1.658    | 2.651 | 1.725    | 3.050 | 1.726    | 2.859 |
| 1.557    | 2.594 | 1.668    | 2.984 | 1.677    | 2.776 |
| 1.442    | 2.547 | 1.588    | 2.888 | 1.607    | 2.694 |



|       |       |       |       |       |       |
|-------|-------|-------|-------|-------|-------|
| 1.321 | 2.514 | 1.508 | 2.832 | 1.539 | 2.609 |
| 1.206 | 2.470 | 1.447 | 2.736 | 1.481 | 2.533 |
| 1.127 | 2.444 | 1.384 | 2.672 | 1.419 | 2.472 |
| 1.099 | 2.415 | 1.332 | 2.594 | 1.371 | 2.386 |
| 1.072 | 2.369 | 1.298 | 2.468 | 1.346 | 2.322 |
| 1.060 | 2.337 | 1.269 | 2.275 | 1.328 | 2.264 |
| 1.045 | 2.272 | 1.263 | 2.215 | 1.304 | 2.052 |
| 1.031 | 2.172 | 1.252 | 2.106 | 1.288 | 1.724 |
| 1.007 | 1.978 | 1.246 | 2.047 | 1.286 | 1.461 |
| 1.001 | 1.908 | 1.236 | 1.847 | 1.280 | 1.271 |
| 0.995 | 1.851 | 1.231 | 1.726 | 1.271 | 1.150 |
| 0.977 | 1.661 | 1.224 | 1.646 | 1.253 | 1.079 |
| 0.972 | 1.596 | 1.214 | 1.454 | 1.218 | 1.027 |
| 0.961 | 1.507 | 1.196 | 1.274 | 1.170 | 0.969 |
| 0.930 | 1.416 | 1.186 | 1.234 | 1.117 | 0.908 |
| 0.909 | 1.390 | 1.165 | 1.178 | 1.067 | 0.852 |
| 0.892 | 1.363 | 1.128 | 1.090 | 1.015 | 0.803 |
| 0.829 | 1.281 | 1.042 | 0.988 | 0.964 | 0.752 |
| 0.802 | 1.255 | 1.000 | 0.961 | 0.902 | 0.712 |
| 0.779 | 1.234 | 0.906 | 0.873 | 0.854 | 0.665 |
| 0.704 | 1.169 | 0.865 | 0.837 | 0.799 | 0.634 |
| 0.627 | 1.090 | 0.779 | 0.769 | 0.753 | 0.605 |
| 0.586 | 1.053 | 0.695 | 0.693 | 0.704 | 0.565 |
| 0.550 | 1.024 | 0.649 | 0.656 | 0.657 | 0.535 |
| 0.459 | 0.939 | 0.618 | 0.638 | 0.619 | 0.507 |
| 0.435 | 0.910 | 0.443 | 0.507 | 0.582 | 0.480 |
| 0.387 | 0.867 | 0.366 | 0.419 | 0.540 | 0.450 |
| 0.354 | 0.829 | 0.287 | 0.364 | 0.499 | 0.441 |
| 0.318 | 0.798 | 0.236 | 0.323 | 0.478 | 0.412 |
| 0.270 | 0.741 | 0.203 | 0.302 | 0.447 | 0.394 |
| 0.238 | 0.698 | 0.182 | 0.281 | 0.417 | 0.380 |
| 0.204 | 0.654 | 0.168 | 0.265 | 0.390 | 0.359 |
| 0.159 | 0.598 | 0.151 | 0.249 | 0.368 | 0.349 |
|       |       | 0.151 | 0.239 | 0.351 | 0.321 |
|       |       | 0.136 | 0.231 | 0.331 | 0.314 |

|  |  |  |  |       |       |
|--|--|--|--|-------|-------|
|  |  |  |  | 0.287 | 0.277 |
|  |  |  |  | 0.247 | 0.260 |
|  |  |  |  | 0.230 | 0.232 |
|  |  |  |  | 0.202 | 0.224 |
|  |  |  |  | 0.185 | 0.201 |
|  |  |  |  | 0.167 | 0.178 |
|  |  |  |  | 0.151 | 0.175 |
|  |  |  |  | 0.146 | 0.165 |
|  |  |  |  | 0.133 | 0.152 |
|  |  |  |  | 0.121 | 0.147 |
|  |  |  |  | 0.115 | 0.141 |

**Table S3.** Experimentally measured values of pressure and mass during adsorption of Propane in MCM-41 at -21°C.

| 60 Å     |       | 80 Å     |       | 100 Å    |       |
|----------|-------|----------|-------|----------|-------|
| Pressure | Mass  | Pressure | Mass  | Pressure | Mass  |
| (bar)    | (g)   | (bar)    | (g)   | (bar)    | (g)   |
| 0.128    | 0.000 | 0.066    | 0.000 | 0.112    | 0.000 |
| 0.152    | 0.227 | 0.216    | 0.221 | 0.242    | 0.170 |
| 0.157    | 0.228 | 0.498    | 0.456 | 0.480    | 0.350 |
| 0.237    | 0.461 | 0.854    | 0.678 | 0.479    | 0.354 |
| 0.408    | 0.699 | 0.852    | 0.688 | 0.770    | 0.522 |
| 0.657    | 0.918 | 1.191    | 0.896 | 1.063    | 0.674 |
| 0.957    | 1.143 | 1.471    | 1.116 | 1.330    | 0.824 |
| 1.227    | 1.355 | 1.657    | 1.351 | 1.537    | 1.001 |
| 1.396    | 1.573 | 1.711    | 1.577 | 1.703    | 1.151 |
| 1.463    | 1.800 | 1.725    | 1.799 | 1.704    | 1.173 |
| 1.506    | 2.026 | 1.749    | 2.046 | 1.772    | 1.338 |
| 1.537    | 2.246 | 1.768    | 2.254 | 1.812    | 1.507 |
| 1.640    | 2.468 | 1.801    | 2.477 | 1.821    | 1.675 |
| 2.208    | 2.653 | 1.902    | 2.714 | 1.836    | 1.870 |
| 2.357    | 2.865 | 2.143    | 2.936 | 1.838    | 2.044 |
| 2.379    | 3.016 | 2.311    | 3.133 | 1.851    | 2.196 |
| 2.379    | 3.089 | 2.307    | 3.121 | 1.865    | 2.383 |
| 2.382    | 3.140 | 2.314    | 3.189 | 1.962    | 2.557 |
| 2.382    | 3.182 | 2.325    | 3.219 | 1.963    | 2.552 |

|       |       |       |       |       |       |
|-------|-------|-------|-------|-------|-------|
| 2.386 | 3.186 | 2.325 | 3.303 | 2.131 | 2.713 |
|       |       | 2.335 | 3.387 | 2.120 | 2.703 |
|       |       | 2.339 | 3.500 | 2.274 | 2.870 |
|       |       | 2.343 | 3.597 | 2.332 | 3.035 |
|       |       |       |       | 2.350 | 3.216 |
|       |       |       |       | 2.366 | 3.379 |
|       |       |       |       | 2.367 | 3.607 |

**Table S4.** Experimentally measured values of pressure and mass during desorption of Propane in MCM-41 at -21°C.

| 60 Å     |       | 80 Å     |       | 100 Å    |       |
|----------|-------|----------|-------|----------|-------|
| Pressure | Mass  | Pressure | Mass  | Pressure | Mass  |
| (bar)    | (g)   | (bar)    | (g)   | (bar)    | (g)   |
| 2.241    | 3.192 | 2.237    | 3.206 | 2.185    | 2.992 |
| 2.230    | 3.033 | 2.251    | 3.231 | 2.105    | 2.867 |
| 2.213    | 2.877 | 2.253    | 3.235 | 1.963    | 2.700 |
| 2.149    | 2.728 | 2.249    | 3.228 | 1.829    | 2.556 |
| 1.895    | 2.600 | 2.238    | 3.192 | 1.725    | 2.444 |
| 1.542    | 2.490 | 2.188    | 3.046 | 1.675    | 2.320 |
| 1.395    | 2.394 | 2.040    | 2.898 | 1.658    | 2.213 |
| 1.361    | 2.310 | 2.038    | 2.902 | 1.642    | 1.980 |
| 1.346    | 2.221 | 1.872    | 2.761 | 1.640    | 1.861 |
| 1.328    | 2.133 | 1.751    | 2.642 | 1.628    | 1.747 |
| 1.307    | 1.961 | 1.694    | 2.525 | 1.625    | 1.527 |
| 1.292    | 1.878 | 1.663    | 2.414 | 1.613    | 1.436 |
| 1.285    | 1.793 | 1.648    | 2.305 | 1.605    | 1.318 |
| 1.273    | 1.705 | 1.630    | 2.185 | 1.589    | 1.197 |
| 1.246    | 1.537 | 1.626    | 2.080 | 1.506    | 1.089 |
| 1.213    | 1.459 | 1.613    | 1.968 | 1.403    | 0.992 |
| 1.136    | 1.387 | 1.612    | 1.848 | 1.293    | 0.906 |
| 1.063    | 1.315 | 1.596    | 1.739 | 1.187    | 0.828 |
| 0.979    | 1.246 | 1.591    | 1.628 | 1.067    | 0.757 |
| 0.907    | 1.190 | 1.584    | 1.516 | 0.964    | 0.692 |
| 0.831    | 1.134 | 1.572    | 1.407 | 0.863    | 0.639 |
| 0.764    | 1.085 | 1.549    | 1.312 | 0.770    | 0.593 |
| 0.762    | 1.085 | 1.496    | 1.205 | 0.691    | 0.538 |

|       |       |       |       |       |       |
|-------|-------|-------|-------|-------|-------|
| 0.712 | 1.040 | 1.496 | 1.219 | 0.615 | 0.492 |
| 0.658 | 0.998 | 1.405 | 1.122 | 0.559 | 0.458 |
| 0.608 | 0.966 | 1.308 | 1.036 | 0.502 | 0.425 |
| 0.563 | 0.928 | 1.208 | 0.945 | 0.450 | 0.397 |
| 0.517 | 0.898 | 1.103 | 0.878 | 0.414 | 0.375 |
| 0.483 | 0.875 | 1.003 | 0.790 | 0.377 | 0.354 |
| 0.450 | 0.840 | 0.910 | 0.743 | 0.348 | 0.326 |
| 0.428 | 0.825 | 0.827 | 0.679 | 0.317 | 0.304 |
| 0.403 | 0.806 | 0.746 | 0.646 | 0.298 | 0.323 |
| 0.327 | 0.728 | 0.679 | 0.609 | 0.283 | 0.289 |
| 0.323 | 0.727 | 0.614 | 0.571 | 0.256 | 0.265 |
| 0.279 | 0.674 | 0.558 | 0.519 | 0.239 | 0.256 |
| 0.238 | 0.630 | 0.510 | 0.505 | 0.225 | 0.255 |
| 0.237 | 0.637 | 0.475 | 0.473 | 0.216 | 0.254 |
| 0.204 | 0.593 | 0.430 | 0.447 | 0.201 | 0.224 |
| 0.187 | 0.558 | 0.403 | 0.422 | 0.184 | 0.223 |
| 0.170 | 0.536 | 0.372 | 0.389 | 0.182 | 0.211 |
| 0.154 | 0.524 | 0.344 | 0.394 | 0.167 | 0.206 |
| 0.139 | 0.491 | 0.318 | 0.370 | 0.165 | 0.209 |
| 0.126 | 0.480 | 0.296 | 0.361 | 0.152 | 0.199 |
| 0.125 | 0.462 | 0.279 | 0.339 | 0.152 | 0.190 |
| 0.109 | 0.447 | 0.262 | 0.329 | 0.144 | 0.194 |
| 0.107 | 0.437 | 0.246 | 0.298 | 0.137 | 0.178 |
| 0.099 | 0.425 | 0.229 | 0.300 | 0.130 | 0.168 |
| 0.092 | 0.396 | 0.222 | 0.291 | 0.125 | 0.173 |
| 0.080 | 0.386 | 0.102 | 0.207 | 0.119 | 0.181 |
| 0.078 | 0.365 | 0.089 | 0.214 | 0.118 | 0.164 |
| 0.073 | 0.360 |       |       | 0.109 | 0.154 |
| 0.067 | 0.357 |       |       | 0.093 | 0.149 |
|       |       |       |       | 0.036 | 0.082 |

**Table S5.** Experimentally measured values of pressure and mass during adsorption of Propane in MCM-41 at -15°C.

| 60 Å     |      | 80 Å     |      | 100 Å    |      |
|----------|------|----------|------|----------|------|
| Pressure | Mass | Pressure | Mass | Pressure | Mass |
| (bar)    | (g)  | (bar)    | (g)  | (bar)    | (g)  |

|       |       |       |       |       |       |
|-------|-------|-------|-------|-------|-------|
| 0.138 | 0.000 | 0.066 | 0.000 | 0.114 | 0.000 |
| 0.321 | 0.528 | 0.715 | 0.513 | 0.691 | 0.414 |
| 0.989 | 1.049 | 1.631 | 1.024 | 1.502 | 0.798 |
| 1.320 | 1.252 | 2.095 | 1.549 | 1.775 | 0.966 |
| 1.599 | 1.452 | 2.134 | 1.781 | 1.999 | 1.113 |
| 1.766 | 1.660 | 2.158 | 1.965 | 2.151 | 1.270 |
| 1.832 | 1.872 | 2.181 | 2.182 | 2.217 | 1.446 |
| 1.869 | 2.088 | 2.213 | 2.413 | 2.244 | 1.587 |
| 1.904 | 2.298 | 2.280 | 2.642 | 2.257 | 1.749 |
| 2.125 | 2.505 | 2.499 | 2.835 | 2.266 | 1.907 |
| 2.720 | 2.678 | 2.765 | 3.024 | 2.286 | 2.223 |
| 2.882 | 2.873 | 2.853 | 3.212 | 2.313 | 2.397 |
| 2.915 | 3.068 | 2.861 | 3.244 | 2.423 | 2.548 |
| 2.919 | 3.218 | 2.880 | 3.394 | 2.593 | 2.708 |
| 2.921 | 3.299 | 2.881 | 3.436 | 2.769 | 2.861 |
| 2.927 | 3.380 | 2.882 | 3.508 | 2.850 | 3.015 |
|       |       | 2.889 | 3.582 | 2.883 | 3.163 |
|       |       | 2.893 | 3.674 | 2.899 | 3.321 |

**Table S6.** Experimentally measured values of pressure and mass during desorption of Propane in MCM-41 at -15°C.

| 60 Å     |       | 80 Å     |       | 100 Å    |       |
|----------|-------|----------|-------|----------|-------|
| Pressure | Mass  | Pressure | Mass  | Pressure | Mass  |
| (bar)    | (g)   | (bar)    | (g)   | (bar)    | (g)   |
| 2.783    | 3.328 | 2.814    | 3.926 | 2.711    | 2.989 |
| 2.756    | 3.047 | 2.797    | 3.665 | 2.456    | 2.726 |
| 2.674    | 2.774 | 2.796    | 3.494 | 2.187    | 2.476 |
| 2.056    | 2.540 | 2.769    | 3.272 | 2.098    | 2.250 |
| 1.735    | 2.370 | 2.577    | 2.986 | 2.076    | 2.038 |
| 1.686    | 2.201 | 2.236    | 2.713 | 2.056    | 1.804 |
| 1.670    | 2.050 | 2.103    | 2.499 | 2.048    | 1.610 |
| 1.661    | 1.884 | 2.062    | 2.288 | 2.032    | 1.400 |
| 1.634    | 1.722 | 2.040    | 2.069 | 1.960    | 1.171 |
| 1.572    | 1.567 | 2.017    | 1.857 | 1.717    | 0.990 |
| 1.401    | 1.408 | 2.000    | 1.644 | 1.460    | 0.835 |
| 1.198    | 1.265 | 1.959    | 1.394 | 1.171    | 0.676 |

|       |       |       |       |       |       |
|-------|-------|-------|-------|-------|-------|
| 1.014 | 1.146 | 1.773 | 1.187 | 0.929 | 0.558 |
| 0.850 | 1.049 | 1.511 | 1.009 | 0.732 | 0.468 |
| 0.720 | 0.971 | 1.240 | 0.834 | 0.583 | 0.409 |
| 0.619 | 0.900 | 1.007 | 0.717 | 0.482 | 0.356 |
| 0.540 | 0.850 | 0.805 | 0.607 | 0.402 | 0.324 |
| 0.470 | 0.793 | 0.659 | 0.531 | 0.337 | 0.277 |
| 0.419 | 0.756 | 0.548 | 0.469 | 0.178 | 0.181 |
| 0.377 | 0.717 | 0.454 | 0.423 | 0.107 | 0.137 |
| 0.330 | 0.689 | 0.388 | 0.382 | 0.072 | 0.100 |
| 0.303 | 0.659 | 0.331 | 0.342 | 0.058 | 0.092 |
| 0.219 | 0.577 | 0.295 | 0.317 |       |       |
| 0.146 | 0.494 | 0.140 | 0.160 |       |       |
| 0.144 | 0.485 | 0.079 | 0.102 |       |       |
| 0.099 | 0.407 |       |       |       |       |

**Table S7.** Experimentally measured values of pressure and mass during adsorption of Propane in MCM-41 at -12°C.

| 60 Å     |       | 80 Å     |       | 100 Å    |       |
|----------|-------|----------|-------|----------|-------|
| Pressure | Mass  | Pressure | Mass  | Pressure | Mass  |
| (psia)   | (g)   | (psia)   | (g)   | (psia)   | (g)   |
| 0.134    | 0.000 | 0.066    | 0.000 | 0.111    | 0.000 |
| 0.240    | 0.377 | 0.497    | 0.392 | 0.497    | 0.307 |
| 0.586    | 0.745 | 1.197    | 0.729 | 1.114    | 0.578 |
| 1.150    | 1.075 | 1.851    | 1.049 | 1.704    | 0.839 |
| 1.724    | 1.424 | 2.278    | 1.415 | 2.171    | 1.102 |
| 2.008    | 1.769 | 2.362    | 1.795 | 2.419    | 1.371 |
| 2.086    | 2.122 | 2.402    | 2.145 | 2.487    | 1.655 |
| 2.227    | 2.474 | 2.459    | 2.498 | 2.511    | 1.948 |
| 3.125    | 2.777 | 2.754    | 2.870 | 2.533    | 2.219 |
| 3.224    | 3.096 | 3.137    | 3.169 | 2.598    | 2.486 |
| 3.228    | 3.341 | 3.159    | 3.338 | 2.901    | 2.737 |
| 3.234    | 3.408 | 3.174    | 3.475 | 3.150    | 2.997 |
| 3.250    | 4.360 | 3.188    | 3.755 | 3.193    | 3.270 |
|          |       | 3.189    | 3.985 | 3.216    | 3.537 |
|          |       | 3.203    | 4.263 | 3.224    | 3.689 |
|          |       | 3.201    | 4.689 | 3.224    | 4.140 |

|  |  |       |       |       |       |
|--|--|-------|-------|-------|-------|
|  |  | 3.212 | 4.979 | 3.225 | 4.227 |
|  |  | 3.218 | 5.647 |       |       |

**Table S8.** Experimentally measured values of pressure and mass during desorption of Propane in MCM-41 at -12°C.

| 60 Å     |       | 80 Å     |       | 100 Å    |       |
|----------|-------|----------|-------|----------|-------|
| Pressure | Mass  | Pressure | Mass  | Pressure | Mass  |
| (psia)   | (g)   | (psia)   | (g)   | (psia)   | (g)   |
| 3.121    | 4.738 | 3.150    | 6.043 | 3.117    | 4.338 |
| 3.109    | 4.643 | 3.109    | 4.046 | 3.125    | 4.349 |
| 3.113    | 4.473 | 3.100    | 3.805 | 3.112    | 4.268 |
| 3.107    | 4.427 | 3.099    | 3.638 | 3.110    | 4.141 |
| 3.107    | 4.348 | 3.074    | 3.289 | 3.091    | 3.793 |
| 3.100    | 4.205 | 2.923    | 3.011 | 3.062    | 3.433 |
| 3.086    | 3.857 | 2.564    | 2.798 | 3.031    | 3.092 |
| 3.076    | 3.325 | 2.365    | 2.567 | 2.786    | 2.768 |
| 2.996    | 2.799 | 2.301    | 2.367 | 2.504    | 2.555 |
| 1.979    | 2.402 | 2.279    | 2.148 | 2.371    | 2.361 |
| 1.912    | 2.242 | 2.262    | 1.976 | 2.334    | 2.152 |
| 1.892    | 2.089 | 2.242    | 1.769 | 2.307    | 1.968 |
| 1.879    | 1.931 | 2.212    | 1.570 | 2.293    | 1.791 |
| 1.850    | 1.779 | 2.176    | 1.395 | 2.286    | 1.591 |
| 1.805    | 1.622 | 2.008    | 1.209 | 2.274    | 1.400 |
| 1.682    | 1.483 | 1.789    | 1.058 | 2.222    | 1.232 |
| 1.497    | 1.370 | 1.553    | 0.908 | 2.008    | 1.077 |
| 1.327    | 1.248 | 1.324    | 0.814 | 1.781    | 0.942 |
| 1.149    | 1.156 | 1.120    | 0.699 | 1.537    | 0.804 |
| 1.005    | 1.077 | 0.959    | 0.624 | 1.308    | 0.706 |
| 0.879    | 1.012 | 0.817    | 0.555 | 1.105    | 0.616 |
| 0.771    | 0.941 | 0.701    | 0.502 | 0.936    | 0.557 |
| 0.686    | 0.887 | 0.605    | 0.447 | 0.800    | 0.480 |
| 0.612    | 0.843 | 0.522    | 0.433 | 0.674    | 0.420 |
| 0.546    | 0.804 | 0.462    | 0.375 | 0.582    | 0.380 |
| 0.492    | 0.759 | 0.411    | 0.379 | 0.504    | 0.346 |
| 0.460    | 0.728 | 0.366    | 0.328 | 0.438    | 0.303 |
| 0.412    | 0.702 | 0.324    | 0.298 | 0.389    | 0.291 |

|       |       |       |       |       |       |
|-------|-------|-------|-------|-------|-------|
| 0.374 | 0.672 | 0.294 | 0.281 | 0.341 | 0.266 |
| 0.350 | 0.649 | 0.267 | 0.283 | 0.309 | 0.253 |
| 0.318 | 0.630 | 0.217 | 0.248 | 0.273 | 0.221 |
| 0.301 | 0.608 | 0.190 | 0.224 | 0.256 | 0.238 |
| 0.279 | 0.593 | 0.160 | 0.219 | 0.236 | 0.205 |
| 0.263 | 0.574 | 0.138 | 0.199 | 0.216 | 0.208 |
| 0.247 | 0.560 | 0.124 | 0.199 | 0.201 | 0.179 |
| 0.218 | 0.536 |       |       | 0.171 | 0.162 |
| 0.200 | 0.518 |       |       | 0.145 | 0.153 |
| 0.186 | 0.490 |       |       | 0.128 | 0.136 |
| 0.168 | 0.469 |       |       | 0.120 | 0.129 |
| 0.159 | 0.462 |       |       |       |       |
| 0.146 | 0.442 |       |       |       |       |

**Table S9.** Experimentally measured values of pressure and mass during adsorption of Propane in MCM-41 at -9°C.

| 60 Å     |       | 80 Å     |       | 100 Å    |       |
|----------|-------|----------|-------|----------|-------|
| Pressure | Mass  | Pressure | Mass  | Pressure | Mass  |
| (bar)    | (g)   | (bar)    | (g)   | (bar)    | (g)   |
| 0.124    | 0.000 | 0.066    | 0.000 | 0.114    | 0.000 |
| 0.255    | 0.356 | 0.519    | 0.336 | 0.545    | 0.290 |
| 0.636    | 0.719 | 1.246    | 0.708 | 1.199    | 0.536 |
| 1.224    | 1.047 | 1.946    | 1.011 | 1.831    | 0.794 |
| 1.834    | 1.359 | 2.461    | 1.348 | 2.334    | 1.054 |
| 2.204    | 1.694 | 2.612    | 1.693 | 2.655    | 1.304 |
| 2.300    | 2.019 | 2.645    | 2.033 | 2.744    | 1.567 |
| 2.379    | 2.351 | 2.703    | 2.362 | 2.773    | 1.825 |
| 3.180    | 2.643 | 2.848    | 2.726 | 2.791    | 2.099 |
| 3.517    | 2.855 | 3.342    | 3.025 | 2.825    | 2.350 |
| 3.554    | 3.081 | 3.488    | 3.342 | 3.033    | 2.614 |
| 3.573    | 3.262 | 3.500    | 3.373 | 3.289    | 2.796 |
|          |       | 3.506    | 3.452 | 3.462    | 2.941 |
|          |       | 3.516    | 3.639 | 3.513    | 3.143 |
|          |       | 3.534    | 3.915 | 3.529    | 3.339 |
|          |       |          |       | 3.547    | 3.519 |



**Table S10.** Experimentally measured values of pressure and mass during desorption of Propane in MCM-41 at -9°C.

| 60 Å     |       | 80 Å     |       | 100 Å    |       |
|----------|-------|----------|-------|----------|-------|
| Pressure | Mass  | Pressure | Mass  | Pressure | Mass  |
| (bar)    | (g)   | (bar)    | (g)   | (bar)    | (g)   |
| 3.444    | 3.335 | 3.467    | 4.027 | 3.434    | 3.709 |
| 3.420    | 3.141 | 3.434    | 3.593 | 3.426    | 3.588 |
| 3.404    | 3.003 | 3.424    | 3.500 | 3.410    | 3.455 |
| 3.378    | 2.874 | 3.401    | 3.322 | 3.400    | 3.332 |
| 3.285    | 2.751 | 3.351    | 3.179 | 3.385    | 3.213 |
| 3.028    | 2.645 | 3.183    | 2.997 | 3.358    | 3.078 |
| 2.655    | 2.550 | 2.943    | 2.852 | 3.323    | 2.956 |
| 2.340    | 2.477 | 2.739    | 2.734 | 3.206    | 2.846 |
| 2.214    | 2.373 | 2.634    | 2.604 | 3.044    | 2.706 |
| 2.172    | 2.276 | 2.588    | 2.493 | 2.857    | 2.586 |
| 2.160    | 2.179 | 2.562    | 2.355 | 2.695    | 2.456 |
| 2.146    | 1.985 | 2.551    | 2.235 | 2.625    | 2.331 |
| 2.130    | 1.888 | 2.529    | 2.057 | 2.604    | 2.217 |
| 2.114    | 1.805 | 2.509    | 1.897 | 2.585    | 2.086 |
| 2.083    | 1.710 | 2.493    | 1.742 | 2.572    | 1.966 |
| 2.034    | 1.614 | 2.470    | 1.583 | 2.555    | 1.711 |
| 1.957    | 1.520 | 2.432    | 1.406 | 2.544    | 1.587 |
| 1.855    | 1.448 | 2.293    | 1.252 | 2.539    | 1.471 |
| 1.743    | 1.375 | 2.108    | 1.123 | 2.521    | 1.353 |
| 1.623    | 1.309 | 1.634    | 0.878 | 2.456    | 1.218 |
| 1.523    | 1.260 | 1.397    | 0.778 | 2.316    | 1.114 |
| 1.393    | 1.188 | 1.213    | 0.717 | 2.164    | 1.024 |
| 1.286    | 1.124 | 0.979    | 0.611 | 2.007    | 0.933 |
| 1.191    | 1.076 | 0.867    | 0.550 | 1.840    | 0.862 |
| 1.108    | 1.038 | 0.615    | 0.419 | 1.633    | 0.758 |
| 1.042    | 1.000 | 0.529    | 0.374 | 1.447    | 0.694 |
| 0.989    | 0.976 | 0.173    | 0.194 | 1.281    | 0.627 |
| 0.945    | 0.946 |          |       | 1.053    | 0.547 |
| 0.908    | 0.933 |          |       | 0.979    | 0.514 |
| 0.875    | 0.918 |          |       | 0.911    | 0.475 |
| 0.791    | 0.870 |          |       | 0.877    | 0.461 |

|       |       |  |  |       |       |
|-------|-------|--|--|-------|-------|
| 0.714 | 0.832 |  |  | 0.843 | 0.452 |
| 0.651 | 0.786 |  |  | 0.681 | 0.372 |
| 0.576 | 0.738 |  |  | 0.573 | 0.325 |
| 0.526 | 0.703 |  |  | 0.366 | 0.232 |
| 0.470 | 0.673 |  |  | 0.235 | 0.168 |
| 0.430 | 0.647 |  |  | 0.187 | 0.148 |
| 0.402 | 0.618 |  |  |       |       |
| 0.297 | 0.528 |  |  |       |       |
| 0.262 | 0.501 |  |  |       |       |

**Table S11.** Experimentally measured values of pressure and mass during adsorption of Propane in MCM-41 at -6°C.

| 60 Å     |       | 80 Å     |       | 100 Å    |       |
|----------|-------|----------|-------|----------|-------|
| Pressure | Mass  | Pressure | Mass  | Pressure | Mass  |
| (bar)    | (g)   | (bar)    | (g)   | (bar)    | (g)   |
| 0.128    | 0.000 | 0.066    | 0.000 | 0.114    | 0.000 |
| 0.329    | 0.464 | 0.761    | 0.440 | 0.813    | 0.390 |
| 0.977    | 0.902 | 1.797    | 0.878 | 1.780    | 0.744 |
| 1.829    | 1.324 | 2.615    | 1.321 | 2.559    | 1.089 |
| 2.434    | 1.734 | 2.888    | 1.741 | 2.969    | 1.411 |
| 2.529    | 1.920 | 2.950    | 2.168 | 3.055    | 1.763 |
| 2.540    | 2.120 | 3.055    | 2.611 | 3.076    | 2.116 |
| 2.559    | 2.357 | 3.651    | 3.027 | 3.141    | 2.471 |
| 2.973    | 2.558 | 3.851    | 3.300 | 3.569    | 2.778 |
| 3.873    | 2.924 | 3.865    | 3.524 | 3.861    | 3.097 |
| 3.917    | 3.206 | 3.870    | 3.748 | 3.897    | 3.430 |
| 3.915    | 3.338 | 3.888    | 4.007 |          |       |
| 3.923    | 3.424 | 3.884    | 4.166 |          |       |
| 3.923    | 3.713 | 3.899    | 4.525 |          |       |
| 3.929    | 3.788 |          |       |          |       |

**Table S12.** Experimentally measured values of pressure and mass during desorption of Propane in MCM-41 at -6°C.

| 60 Å     |       | 80 Å     |       | 100 Å    |       |
|----------|-------|----------|-------|----------|-------|
| Pressure | Mass  | Pressure | Mass  | Pressure | Mass  |
| (bar)    | (g)   | (bar)    | (g)   | (bar)    | (g)   |
| 3.808    | 4.061 | 3.835    | 4.839 | 3.796    | 3.713 |
| 3.798    | 3.931 | 3.833    | 4.658 | 3.762    | 3.460 |

|       |       |       |       |       |       |
|-------|-------|-------|-------|-------|-------|
| 3.789 | 3.852 | 3.828 | 4.647 | 3.732 | 3.190 |
| 3.783 | 3.511 | 3.816 | 4.441 | 3.625 | 2.919 |
| 3.760 | 3.238 | 3.809 | 4.240 | 3.270 | 2.698 |
| 3.724 | 2.975 | 3.796 | 4.021 | 3.263 | 2.694 |
| 3.726 | 2.978 | 3.792 | 3.836 | 3.266 | 2.689 |
| 3.472 | 2.723 | 3.794 | 3.816 | 3.265 | 2.691 |
| 2.691 | 2.536 | 3.784 | 3.685 | 2.985 | 2.480 |
| 2.436 | 2.380 | 3.765 | 3.407 | 2.900 | 2.273 |
| 2.405 | 2.209 | 3.682 | 3.159 | 2.874 | 2.071 |
| 2.388 | 2.047 | 3.324 | 2.915 | 2.868 | 2.067 |
| 2.399 | 2.044 | 2.996 | 2.683 | 2.851 | 1.872 |
| 2.359 | 1.881 | 2.876 | 2.493 | 2.835 | 1.680 |
| 2.298 | 1.733 | 2.828 | 2.305 | 2.820 | 1.465 |
| 2.174 | 1.583 | 2.809 | 2.089 | 2.732 | 1.281 |
| 1.976 | 1.453 | 2.786 | 1.893 | 2.476 | 1.103 |
| 1.756 | 1.336 | 2.756 | 1.689 | 2.169 | 0.961 |
| 1.542 | 1.232 | 2.720 | 1.506 | 2.175 | 0.959 |
| 1.353 | 1.141 | 2.572 | 1.321 | 2.173 | 0.949 |
| 1.191 | 1.064 | 2.323 | 1.177 | 1.877 | 0.826 |
| 1.053 | 0.994 | 2.051 | 1.048 | 1.604 | 0.726 |
| 0.938 | 0.927 | 1.787 | 0.915 | 1.357 | 0.646 |
| 0.826 | 0.882 | 1.542 | 0.810 | 1.149 | 0.542 |
| 0.741 | 0.840 | 1.323 | 0.743 | 0.973 | 0.489 |
| 0.669 | 0.797 | 1.140 | 0.639 | 0.830 | 0.437 |
| 0.603 | 0.758 | 0.974 | 0.552 | 0.832 | 0.434 |
| 0.543 | 0.728 | 0.848 | 0.511 | 0.714 | 0.398 |
| 0.546 | 0.727 | 0.854 | 0.515 | 0.615 | 0.359 |
| 0.504 | 0.695 | 0.735 | 0.469 | 0.532 | 0.322 |
| 0.459 | 0.673 | 0.649 | 0.429 | 0.465 | 0.297 |
| 0.423 | 0.645 | 0.655 | 0.433 | 0.414 | 0.261 |
| 0.390 | 0.624 | 0.572 | 0.397 | 0.365 | 0.248 |
| 0.391 | 0.627 | 0.505 | 0.361 | 0.332 | 0.228 |
| 0.371 | 0.599 | 0.453 | 0.344 | 0.296 | 0.219 |
| 0.339 | 0.582 | 0.454 | 0.341 | 0.267 | 0.196 |
| 0.325 | 0.569 | 0.396 | 0.299 | 0.249 | 0.200 |

|       |       |         |       |         |       |
|-------|-------|---------|-------|---------|-------|
| 0.308 | 0.552 | 0.365   | 0.301 | 0.230   | 0.177 |
| 0.289 | 0.538 | 0.323   | 0.274 | 0.227   | 0.174 |
| 0.287 | 0.537 | 0.302   | 0.277 | 0.226   | 0.190 |
| 0.274 | 0.533 | 0.276   | 0.264 | 0.236   | 0.177 |
| 0.256 | 0.514 | 0.255   | 0.236 | 0.230   | 0.171 |
| 0.247 | 0.504 | 0.236   | 0.231 | 0.214   | 0.177 |
| 0.237 | 0.488 | 0.222   | 0.221 | 0.209   | 0.160 |
| 0.224 | 0.480 | 0.209   | 0.212 | 0.215   | 0.174 |
| 0.215 | 0.475 | 0.193   | 0.198 | 0.200   | 0.164 |
| 0.211 | 0.461 | 0.193   | 0.192 | 0.184   | 0.146 |
| 0.195 | 0.453 | 0.182   | 0.204 | 0.168   | 0.136 |
| 0.189 | 0.444 | 0.181   | 0.196 | 0.161   | 0.142 |
| 0.178 | 0.439 | 0.169   | 0.204 | 0.153   | 0.146 |
| 0.173 | 0.417 | 0.164   | 0.188 | 0.138   | 0.126 |
| 0.170 | 0.422 | 0.153   | 0.191 | 0.137   | 0.142 |
| 0.170 | 0.417 | 0.146   | 0.179 | 0.130   | 0.128 |
| 0.162 | 0.400 | 0.146   | 0.166 | 0.134   | 0.124 |
| 0.159 | 0.397 | 0.148   | 0.171 | 0.126   | 0.123 |
| 0.149 | 0.394 | 0.142   | 0.174 | 0.117   | 0.119 |
|       |       | 0.129   | 0.165 | 0.109   | 0.119 |
|       |       | 0.127   | 0.165 | 0.115   | 0.122 |
|       |       | 0.126   | 0.173 | 0.112   | 0.110 |
|       |       | 0.125   | 0.155 | 0.101   | 0.112 |
|       |       | 0.126   | 0.164 | 0.102   | 0.114 |
|       |       | 0.110   | 0.146 | 0.102   | 0.113 |
|       |       | 0.108   | 0.160 | 0.093   | 0.105 |
|       |       | 0.10762 | 0.153 | 0.08631 | 0.103 |

**Table S13.** Experimentally measured values of pressure and mass during adsorption of Propane in MCM-41 at -3°C.

| 60 Å     |       | 80 Å     |       | 100 Å    |       |
|----------|-------|----------|-------|----------|-------|
| Pressure | Mass  | Pressure | Mass  | Pressure | Mass  |
| (bar)    | (g)   | (bar)    | (g)   | (bar)    | (g)   |
| 0.133    | 0.000 | 0.066    | 0.000 | 0.119    | 0.000 |
| 0.220    | 0.280 | 0.428    | 0.291 | 0.467    | 0.220 |
| 0.481    | 0.546 | 0.990    | 0.518 | 1.003    | 0.425 |

|       |       |       |       |       |       |
|-------|-------|-------|-------|-------|-------|
| 0.890 | 0.805 | 1.606 | 0.752 | 1.561 | 0.612 |
| 0.890 | 0.806 | 2.169 | 0.990 | 1.564 | 0.605 |
| 1.405 | 1.041 | 2.633 | 1.186 | 2.104 | 0.799 |
| 1.922 | 1.264 | 2.994 | 1.381 | 2.565 | 0.981 |
| 2.364 | 1.476 | 3.167 | 1.608 | 2.927 | 1.160 |
| 2.661 | 1.690 | 3.205 | 1.815 | 3.199 | 1.322 |
| 2.786 | 1.913 | 3.238 | 2.060 | 3.318 | 1.499 |
| 2.839 | 2.120 | 3.272 | 2.284 | 3.356 | 1.678 |
| 2.902 | 2.343 | 3.321 | 2.482 | 3.375 | 1.845 |
| 3.179 | 2.538 | 3.421 | 2.677 | 3.389 | 2.019 |
| 3.902 | 2.696 | 3.712 | 2.871 | 3.406 | 2.191 |
| 3.900 | 2.695 | 4.060 | 3.076 | 3.437 | 2.351 |
| 4.229 | 2.871 | 4.212 | 3.249 | 3.507 | 2.518 |
| 4.279 | 3.056 | 4.227 | 3.312 | 3.732 | 2.662 |
| 4.306 | 3.176 | 4.229 | 3.312 | 3.972 | 2.812 |
| 4.306 | 3.254 |       |       | 4.165 | 2.965 |
| 4.310 | 3.304 |       |       | 4.246 | 3.108 |
| 4.312 | 3.313 |       |       | 4.268 | 3.250 |

**Table S14.** Experimentally measured values of pressure and mass during desorption of Propane in MCM-41 at -3°C.

| 60 Å     |       | 80 Å     |       | 100 Å    |       |
|----------|-------|----------|-------|----------|-------|
| Pressure | Mass  | Pressure | Mass  | Pressure | Mass  |
| (bar)    | (g)   | (bar)    | (g)   | (bar)    | (g)   |
| 4.177    | 3.344 | 4.171    | 3.428 | 4.157    | 3.400 |
| 4.171    | 3.306 | 4.177    | 3.428 | 4.104    | 3.158 |
| 4.148    | 3.155 | 4.164    | 3.390 | 3.948    | 2.911 |
| 4.092    | 2.909 | 4.102    | 3.240 | 3.588    | 2.688 |
| 3.671    | 2.687 | 3.794    | 3.000 | 3.305    | 2.493 |
| 2.915    | 2.520 | 3.802    | 2.991 | 3.221    | 2.308 |
| 2.733    | 2.358 | 3.418    | 2.804 | 3.190    | 2.097 |
| 2.699    | 2.200 | 3.222    | 2.598 | 3.175    | 1.922 |
| 2.668    | 2.046 | 3.165    | 2.408 | 3.158    | 1.729 |
| 2.635    | 1.894 | 3.132    | 2.226 | 3.130    | 1.544 |

|       |       |       |       |       |       |
|-------|-------|-------|-------|-------|-------|
| 2.568 | 1.744 | 3.106 | 2.047 | 3.070 | 1.356 |
| 2.440 | 1.598 | 3.081 | 1.869 | 2.822 | 1.174 |
| 2.244 | 1.477 | 3.042 | 1.722 | 2.532 | 1.033 |
| 2.002 | 1.367 | 2.995 | 1.525 | 2.226 | 0.886 |
| 1.783 | 1.257 | 2.823 | 1.331 |       |       |
|       |       | 2.565 | 1.199 |       |       |

**Table S15.** Experimentally measured values of pressure and mass during adsorption of Propane in MCM-41 at 0°C.

| 60 Å     |       | 80 Å     |       | 100 Å    |       |
|----------|-------|----------|-------|----------|-------|
| Pressure | Mass  | Pressure | Mass  | Pressure | Mass  |
| (bar)    | (g)   | (bar)    | (g)   | (bar)    | (g)   |
| 0.131    | 0.000 | 0.066    | 0.000 | 0.107    | 0.000 |
| 0.277    | 0.334 | 0.070    | 0.015 | 0.646    | 0.290 |
| 0.671    | 0.659 | 0.572    | 0.334 | 0.639    | 0.286 |
| 1.292    | 0.951 | 0.570    | 0.321 | 0.638    | 0.278 |
| 1.963    | 1.236 | 1.355    | 0.623 | 1.407    | 0.539 |
| 2.565    | 1.493 | 1.359    | 0.610 | 2.155    | 0.773 |
| 2.951    | 1.737 | 2.149    | 0.874 | 3.141    | 1.146 |
| 3.101    | 1.975 | 2.802    | 1.172 | 3.511    | 1.362 |
| 3.174    | 2.237 | 3.276    | 1.419 | 3.507    | 1.370 |
| 3.261    | 2.464 | 3.500    | 1.677 | 3.662    | 1.570 |
| 3.969    | 2.660 | 3.552    | 1.914 | 3.698    | 1.783 |
| 4.570    | 2.840 | 3.586    | 2.166 | 3.703    | 1.793 |
| 4.692    | 3.030 | 3.635    | 2.422 | 3.699    | 1.784 |
| 4.723    | 3.182 | 3.712    | 2.675 | 3.731    | 1.969 |
| 4.727    | 3.216 | 3.997    | 2.882 | 3.749    | 2.187 |
| 4.726    | 3.288 | 4.410    | 3.090 | 3.783    | 2.386 |
| 4.733    | 3.320 | 4.619    | 3.265 | 3.906    | 2.575 |
| 4.733    | 3.432 | 4.645    | 3.321 | 3.905    | 2.579 |
| 4.739    | 3.458 | 4.650    | 3.368 | 4.180    | 2.746 |
| 4.742    | 3.492 | 4.665    | 3.470 | 4.468    | 2.901 |
|          |       | 4.677    | 3.592 | 4.628    | 3.065 |
|          |       | 4.682    | 3.657 | 4.680    | 3.231 |
|          |       | 4.701    | 3.824 | 4.679    | 3.220 |
|          |       | 4.701    | 3.947 | 4.710    | 3.370 |

|  |  |       |       |       |       |
|--|--|-------|-------|-------|-------|
|  |  | 4.706 | 4.072 | 4.721 | 3.472 |
|  |  | 4.711 | 4.240 | 4.727 | 3.535 |
|  |  | 4.717 | 4.422 | 4.722 | 3.579 |
|  |  | 4.722 | 4.705 | 4.730 | 3.617 |
|  |  |       |       | 4.733 | 3.672 |
|  |  |       |       | 4.731 | 3.696 |

**Table S16.** Experimentally measured values of pressure and mass during desorption of Propane in MCM-41 at 0°C.

| 60 Å     |       | 80 Å     |       | 100 Å    |       |
|----------|-------|----------|-------|----------|-------|
| Pressure | Mass  | Pressure | Mass  | Pressure | Mass  |
| (bar)    | (g)   | (bar)    | (g)   | (bar)    | (g)   |
| 4.605    | 3.461 | 4.656    | 4.722 | 4.619    | 3.778 |
| 4.604    | 3.444 | 4.635    | 4.589 | 4.607    | 3.725 |
| 4.592    | 3.394 | 4.627    | 4.426 | 4.572    | 3.451 |
| 4.574    | 3.226 | 4.615    | 4.250 | 4.464    | 3.054 |
| 4.522    | 2.993 | 4.601    | 4.107 | 3.892    | 2.687 |
| 4.232    | 2.767 | 4.588    | 3.851 | 3.585    | 2.347 |
| 3.464    | 2.592 | 4.569    | 3.593 | 3.530    | 2.039 |
| 3.065    | 2.435 | 4.534    | 3.336 | 3.499    | 1.708 |
| 3.022    | 2.284 | 4.402    | 3.101 | 3.430    | 1.412 |
| 2.997    | 2.131 | 3.993    | 2.878 | 2.966    | 1.147 |
| 2.945    | 1.985 | 3.657    | 2.704 | 2.416    | 0.896 |
| 2.878    | 1.823 | 3.524    | 2.498 | 1.902    | 0.748 |
| 2.765    | 1.685 | 3.473    | 2.332 | 1.495    | 0.603 |
| 2.573    | 1.558 | 3.450    | 2.162 | 1.171    | 0.499 |
| 2.348    | 1.438 | 3.423    | 1.964 | 0.924    | 0.431 |
| 2.111    | 1.338 | 3.396    | 1.772 | 0.743    | 0.376 |
| 1.885    | 1.246 | 3.364    | 1.610 | 0.608    | 0.318 |
| 1.684    | 1.158 | 3.279    | 1.452 | 0.421    | 0.244 |
| 1.489    | 1.087 | 3.033    | 1.264 | 0.179    | 0.128 |
| 1.346    | 1.026 | 2.758    | 1.130 | 0.057    | 0.065 |
| 1.207    | 0.970 | 2.466    | 1.037 |          |       |
| 1.088    | 0.919 | 2.181    | 0.941 |          |       |
| 0.990    | 0.876 | 1.924    | 0.845 |          |       |
| 0.898    | 0.830 | 1.689    | 0.759 |          |       |

|       |       |       |       |  |  |
|-------|-------|-------|-------|--|--|
| 0.817 | 0.799 | 1.485 | 0.661 |  |  |
| 0.747 | 0.765 | 1.310 | 0.601 |  |  |
| 0.687 | 0.733 | 1.016 | 0.513 |  |  |
| 0.639 | 0.707 | 0.905 | 0.456 |  |  |
| 0.550 | 0.651 | 0.801 | 0.415 |  |  |
| 0.504 | 0.632 | 0.716 | 0.399 |  |  |
| 0.473 | 0.613 | 0.652 | 0.375 |  |  |
| 0.392 | 0.568 | 0.521 | 0.312 |  |  |
| 0.335 | 0.523 | 0.474 | 0.301 |  |  |
| 0.222 | 0.430 | 0.435 | 0.289 |  |  |
| 0.172 | 0.371 | 0.397 | 0.264 |  |  |
| 0.133 | 0.314 | 0.365 | 0.258 |  |  |
|       |       | 0.346 | 0.239 |  |  |
|       |       | 0.263 | 0.199 |  |  |
|       |       | 0.176 | 0.138 |  |  |
|       |       | 0.147 | 0.100 |  |  |
|       |       | 0.128 | 0.096 |  |  |
|       |       | 0.070 | 0.055 |  |  |



**Table S17.** Experimentally measured values of pressure and mass during adsorption of Propane in MCM-41 at +3°C.

| 60 Å     |       | 80 Å     |       | 100 Å    |       |
|----------|-------|----------|-------|----------|-------|
| Pressure | Mass  | Pressure | Mass  | Pressure | Mass  |
| (bar)    | (g)   | (bar)    | (g)   | (bar)    | (g)   |
| 0.135    | 0.000 | 0.066    | 0.000 | 0.110    | 0.000 |
| 0.292    | 0.334 | 0.622    | 0.375 | 0.690    | 0.280 |
| 0.730    | 0.659 | 1.469    | 0.686 | 1.521    | 0.533 |
| 1.384    | 0.975 | 2.301    | 0.958 | 2.331    | 0.780 |
| 2.126    | 1.240 | 3.001    | 1.222 | 3.024    | 1.005 |
| 2.754    | 1.478 | 3.523    | 1.464 | 3.541    | 1.212 |
| 3.208    | 1.720 | 3.832    | 1.698 | 3.894    | 1.405 |
| 3.396    | 1.947 | 3.900    | 1.911 | 4.037    | 1.607 |
| 3.483    | 2.176 | 3.935    | 2.125 | 4.084    | 1.779 |
| 3.560    | 2.394 | 3.982    | 2.321 | 4.101    | 1.967 |
| 3.896    | 2.596 | 4.023    | 2.516 | 4.116    | 2.139 |
| 4.622    | 2.742 | 4.102    | 2.710 | 4.138    | 2.331 |
| 5.014    | 2.866 | 4.304    | 2.898 | 4.202    | 2.503 |
| 5.130    | 2.987 | 4.639    | 3.035 | 4.397    | 2.645 |
| 5.166    | 3.139 | 4.924    | 3.193 | 4.643    | 2.777 |
| 5.186    | 3.236 | 5.056    | 3.315 | 4.878    | 2.900 |
| 5.205    | 3.342 | 5.089    | 3.353 | 5.033    | 3.023 |
|          |       | 5.084    | 3.367 | 5.108    | 3.142 |
|          |       | 5.124    | 3.462 | 5.141    | 3.244 |
|          |       | 5.149    | 3.654 | 5.158    | 3.321 |
|          |       | 5.165    | 3.778 | 5.169    | 3.377 |
|          |       | 5.173    | 3.820 | 5.180    | 3.487 |
|          |       | 5.174    | 3.918 |          |       |

**Table S18.** Experimentally measured values of pressure and mass during desorption of Propane in MCM-41 at +3°C.

| 60 Å     |      | 80 Å     |       | 100 Å    |       |
|----------|------|----------|-------|----------|-------|
| Pressure | Mass | Pressure | Mass  | Pressure | Mass  |
| (bar)    | (g)  | (bar)    | (g)   | (bar)    | (g)   |
|          |      | 5.121    | 4.052 | 5.071    | 3.501 |
|          |      | 5.089    | 3.918 | 5.059    | 3.468 |

|  |  |       |       |       |       |
|--|--|-------|-------|-------|-------|
|  |  | 5.056 | 3.716 | 5.040 | 3.410 |
|  |  | 5.007 | 3.468 | 5.046 | 3.413 |
|  |  | 4.723 | 3.132 | 4.933 | 3.088 |
|  |  | 4.114 | 2.849 | 4.452 | 2.782 |
|  |  | 3.883 | 2.583 | 4.019 | 2.527 |
|  |  | 3.813 | 2.323 | 4.019 | 2.523 |
|  |  | 3.772 | 2.061 | 3.917 | 2.255 |
|  |  | 3.721 | 1.797 | 3.883 | 2.005 |
|  |  | 3.602 | 1.563 | 3.858 | 1.708 |
|  |  | 3.188 | 1.325 | 3.757 | 1.428 |
|  |  | 2.729 | 1.141 | 3.328 | 1.202 |
|  |  | 2.285 | 0.987 | 2.815 | 0.997 |
|  |  | 1.894 | 0.837 | 2.325 | 0.829 |
|  |  | 1.568 | 0.726 | 1.894 | 0.692 |
|  |  | 1.574 | 0.736 | 1.536 | 0.596 |
|  |  | 1.572 | 0.733 | 1.252 | 0.507 |
|  |  | 1.299 | 0.629 | 1.032 | 0.443 |
|  |  | 1.085 | 0.580 | 0.849 | 0.392 |
|  |  | 0.912 | 0.515 | 0.715 | 0.338 |
|  |  | 0.907 | 0.513 | 0.597 | 0.296 |
|  |  | 0.919 | 0.507 | 0.515 | 0.269 |
|  |  | 0.782 | 0.459 | 0.447 | 0.254 |
|  |  | 0.782 | 0.469 | 0.382 | 0.222 |
|  |  | 0.665 | 0.403 | 0.335 | 0.199 |
|  |  | 0.569 | 0.356 | 0.298 | 0.186 |
|  |  | 0.487 | 0.329 | 0.270 | 0.181 |
|  |  | 0.436 | 0.322 | 0.267 | 0.186 |
|  |  | 0.384 | 0.295 | 0.249 | 0.154 |
|  |  | 0.390 | 0.288 | 0.224 | 0.150 |
|  |  | 0.347 | 0.283 | 0.218 | 0.149 |
|  |  | 0.309 | 0.263 | 0.202 | 0.150 |
|  |  | 0.273 | 0.259 | 0.188 | 0.150 |
|  |  | 0.249 | 0.233 | 0.186 | 0.144 |
|  |  | 0.227 | 0.224 | 0.173 | 0.133 |
|  |  | 0.212 | 0.202 | 0.166 | 0.127 |

|  |  |         |       |         |       |
|--|--|---------|-------|---------|-------|
|  |  | 0.204   | 0.194 | 0.151   | 0.125 |
|  |  | 0.185   | 0.194 | 0.137   | 0.116 |
|  |  | 0.172   | 0.194 | 0.137   | 0.100 |
|  |  | 0.157   | 0.189 | 0.120   | 0.106 |
|  |  | 0.154   | 0.169 | 0.120   | 0.094 |
|  |  | 0.155   | 0.175 | 0.120   | 0.084 |
|  |  | 0.140   | 0.178 | 0.116   | 0.097 |
|  |  | 0.138   | 0.169 | 0.105   | 0.086 |
|  |  | 0.124   | 0.157 | 0.104   | 0.082 |
|  |  | 0.127   | 0.147 | 0.097   | 0.081 |
|  |  | 0.126   | 0.167 | 0.086   | 0.084 |
|  |  | 0.110   | 0.160 | 0.083   | 0.065 |
|  |  | 0.096   | 0.145 | 0.082   | 0.067 |
|  |  | 0.092   | 0.150 | 0.071   | 0.065 |
|  |  | 0.076   | 0.141 | 0.070   | 0.067 |
|  |  | 0.077   | 0.146 | 0.071   | 0.063 |
|  |  | 0.067   | 0.130 | 0.058   | 0.066 |
|  |  | 0.066   | 0.137 | 0.055   | 0.062 |
|  |  | 0.060   | 0.127 | 0.055   | 0.049 |
|  |  | 0.057   | 0.114 | 0.053   | 0.059 |
|  |  | 0.056   | 0.132 | 0.052   | 0.049 |
|  |  | 0.053   | 0.110 | 0.045   | 0.045 |
|  |  | 0.048   | 0.122 | 0.051   | 0.044 |
|  |  | 0.057   | 0.118 | 0.047   | 0.048 |
|  |  | 0.057   | 0.119 | 0.039   | 0.045 |
|  |  | 0.056   | 0.124 | 0.037   | 0.045 |
|  |  | 0.05145 | 0.117 | 0.03685 | 0.047 |
|  |  | 0.04168 | 0.124 | 0.03665 | 0.036 |
|  |  | 0.04614 | 0.119 | 0.03711 | 0.034 |
|  |  | 0.05231 | 0.124 | 0.03771 | 0.026 |
|  |  | 0.04903 | 0.119 | 0.03093 | 0.035 |

**Table S19.** Experimentally measured values of pressure and mass during adsorption of Propane in MCM-41 at +12°C.

| 60 Å     |       | 80 Å     |       | 100 Å    |       |
|----------|-------|----------|-------|----------|-------|
| Pressure | Mass  | Pressure | Mass  | Pressure | Mass  |
| (bar)    | (g)   | (bar)    | (g)   | (bar)    | (g)   |
| 0.000    | 0.000 | 0.066    | 0.000 | 0.000    | 0.000 |
| 0.149    | 0.211 | 0.414    | 0.085 | 0.217    | 0.068 |
| 0.480    | 0.418 | 0.952    | 0.205 | 0.496    | 0.197 |
| 0.951    | 0.605 | 1.560    | 0.357 | 0.843    | 0.303 |
| 1.566    | 0.785 | 2.193    | 0.545 | 1.190    | 0.417 |
| 2.172    | 0.946 | 2.801    | 0.786 | 1.612    | 0.558 |
| 2.773    | 1.109 | 3.385    | 1.011 | 2.022    | 0.630 |
| 3.339    | 1.270 | 3.883    | 1.249 | 2.445    | 0.757 |
| 3.824    | 1.398 | 4.296    | 1.378 | 2.853    | 0.849 |
| 4.194    | 1.557 | 4.645    | 1.575 | 3.265    | 0.947 |
| 4.405    | 1.694 | 4.933    | 1.737 | 3.623    | 1.050 |
| 4.520    | 1.862 | 5.113    | 1.987 | 3.941    | 1.180 |
| 4.604    | 2.021 | 5.181    | 2.106 | 4.243    | 1.292 |
| 4.707    | 2.161 | 5.290    | 2.378 | 4.538    | 1.400 |
| 5.119    | 2.337 | 5.329    | 2.453 | 4.782    | 1.471 |
| 5.767    | 2.420 | 5.575    | 2.799 | 4.989    | 1.565 |
| 6.297    | 2.501 | 5.845    | 2.994 | 5.313    | 1.735 |
| 6.566    | 2.609 | 6.150    | 3.088 | 5.434    | 1.830 |
| 6.641    | 2.715 | 6.441    | 3.123 | 5.503    | 1.913 |
| 6.667    | 2.808 | 6.626    | 3.216 | 5.536    | 2.004 |
| 6.684    | 2.868 | 6.709    | 3.345 | 5.553    | 2.077 |
| 6.711    | 3.182 | 6.747    | 3.355 | 5.579    | 2.328 |
| 6.718    | 3.207 | 6.753    | 3.454 | 5.603    | 2.489 |
| 6.722    | 3.313 | 6.765    | 3.490 | 5.621    | 2.610 |
| 6.726    | 3.316 | 6.771    | 3.612 | 5.652    | 2.797 |
|          |       | 6.784    | 3.718 | 5.751    | 3.037 |
|          |       |          |       | 5.878    | 3.155 |
|          |       |          |       | 6.067    | 3.288 |
|          |       |          |       | 6.252    | 3.373 |
|          |       |          |       | 6.431    | 3.450 |

|  |  |  |  |       |       |
|--|--|--|--|-------|-------|
|  |  |  |  | 6.606 | 3.555 |
|  |  |  |  | 6.731 | 3.619 |
|  |  |  |  | 6.749 | 3.640 |
|  |  |  |  | 6.769 | 3.645 |
|  |  |  |  | 6.788 | 3.682 |
|  |  |  |  | 6.797 | 3.684 |
|  |  |  |  | 6.797 | 3.708 |

**Table S20.** Experimentally measured values of pressure and mass during desorption of Propane in MCM-41 at +12°C.

| 60 Å     |       | 80 Å     |      | 100 Å    |       |
|----------|-------|----------|------|----------|-------|
| Pressure | Mass  | Pressure | Mass | Pressure | Mass  |
| (bar)    | (g)   | (bar)    | (g)  | (bar)    | (g)   |
| 6.725    | 3.367 | --       | --   | 6.801    | 3.715 |
| 6.717    | 3.297 | --       | --   | 6.805    | 3.701 |
| 6.682    | 3.086 | --       | --   | 6.774    | 3.698 |
| 6.660    | 2.957 | --       | --   | 6.607    | 3.603 |
| 6.622    | 2.754 | --       | --   | 6.314    | 3.462 |
| 6.542    | 2.611 | --       | --   | 6.041    | 3.363 |
| 6.194    | 2.465 | --       | --   | 5.793    | 3.243 |
| 5.518    | 2.324 | --       | --   | 5.576    | 3.142 |
| 4.949    | 2.233 | --       | --   | 5.454    | 3.024 |
| 4.665    | 2.114 | --       | --   | 5.392    | 2.897 |
| 4.578    | 1.993 | --       | --   | 5.356    | 2.774 |
| 4.516    | 1.902 | --       | --   | 5.327    | 2.671 |
| 4.453    | 1.788 | --       | --   | 5.302    | 2.552 |
| 4.371    | 1.670 | --       | --   | 5.283    | 2.455 |
| 4.254    | 1.564 | --       | --   | 5.263    | 2.345 |
| 4.070    | 1.453 | --       | --   | 5.255    | 2.219 |
| 3.844    | 1.367 | --       | --   | 5.237    | 2.119 |
| 3.592    | 1.295 | --       | --   | 5.218    | 2.006 |
| 3.346    | 1.225 | --       | --   | 5.190    | 1.873 |
| 3.106    | 1.158 | --       | --   | 5.102    | 1.753 |
| 2.877    | 1.081 | --       | --   | 4.944    | 1.666 |
| 2.660    | 1.054 |          |      | 4.766    | 1.571 |
| 2.462    | 0.999 |          |      | 4.579    | 1.477 |

|       |       |  |  |       |       |
|-------|-------|--|--|-------|-------|
| 2.275 | 0.949 |  |  | 4.376 | 1.403 |
| 2.106 | 0.907 |  |  | 4.166 | 1.315 |
| 1.811 | 0.831 |  |  | 3.957 | 1.266 |
| 1.681 | 0.814 |  |  | 3.748 | 1.183 |
| 1.372 | 0.707 |  |  | 3.534 | 1.115 |
| 1.071 | 0.616 |  |  | 3.330 | 1.064 |
| 0.951 | 0.570 |  |  | 3.136 | 1.009 |
| 0.852 | 0.538 |  |  | 2.687 | 0.865 |
| 0.697 | 0.478 |  |  | 2.289 | 0.755 |
| 0.490 | 0.404 |  |  | 1.945 | 0.647 |
| 0.452 | 0.393 |  |  | 1.661 | 0.590 |
| 0.419 | 0.369 |  |  | 1.426 | 0.514 |
|       |       |  |  | 1.224 | 0.463 |
|       |       |  |  | 1.055 | 0.391 |
|       |       |  |  | 0.917 | 0.359 |
|       |       |  |  | 0.806 | 0.330 |
|       |       |  |  | 0.705 | 0.289 |
|       |       |  |  | 0.620 | 0.280 |
|       |       |  |  | 0.552 | 0.255 |
|       |       |  |  | 0.493 | 0.225 |
|       |       |  |  | 0.443 | 0.199 |

**Table S21.** Experimentally measured values of pressure and mass during adsorption of Propane in MCM-41 at +20°C.

| 60 Å     |       | 80 Å     |       | 100 Å    |       |
|----------|-------|----------|-------|----------|-------|
| Pressure | Mass  | Pressure | Mass  | Pressure | Mass  |
| (bar)    | (g)   | (bar)    | (g)   | (bar)    | (g)   |
| 0.000    | 0.000 | 0.066    | 0.000 | 0.000    | 0.000 |
| 0.171    | 0.166 | 0.478    | 0.047 | 0.327    | 0.152 |
| 0.568    | 0.403 | 1.075    | 0.126 | 0.800    | 0.286 |
| 1.087    | 0.550 | 3.095    | 0.258 | 1.373    | 0.457 |
| 1.714    | 0.727 | 4.310    | 0.425 | 1.928    | 0.579 |
| 2.371    | 0.884 | 4.808    | 0.544 | 2.501    | 0.712 |
| 3.037    | 1.041 | 5.235    | 0.680 | 3.028    | 0.838 |
| 3.668    | 1.199 | 5.598    | 0.801 | 3.544    | 0.955 |
| 4.237    | 1.313 | 5.929    | 0.876 | 4.007    | 1.080 |

|       |       |       |       |       |       |
|-------|-------|-------|-------|-------|-------|
| 4.738 | 1.440 | 6.179 | 0.977 | 4.431 | 1.173 |
| 5.149 | 1.548 | 6.380 | 1.165 | 4.813 | 1.286 |
| 5.456 | 1.698 | 6.462 | 1.333 | 5.151 | 1.383 |
| 5.637 | 1.799 | 6.664 | 1.848 | 5.461 | 1.492 |
| 5.743 | 1.932 | 6.732 | 2.021 | 5.730 | 1.590 |
| 5.831 | 2.064 | 6.790 | 2.077 | 5.963 | 1.656 |
| 5.921 | 2.171 | 6.886 | 2.200 | 6.183 | 1.743 |
| 6.095 | 2.292 | 7.039 | 2.273 | 6.360 | 1.839 |
| 6.569 | 2.362 | 7.227 | 2.313 | 6.509 | 1.917 |
| 7.019 | 2.430 | 8.128 | 2.488 | 6.630 | 1.985 |
| 7.398 | 2.481 | 8.195 | 2.508 | 6.690 | 2.093 |
| 7.689 | 2.508 | 8.238 | 2.592 | 6.712 | 2.169 |
| 7.909 | 2.565 | 8.270 | 2.885 | 6.729 | 2.247 |
| 8.145 | 2.632 |       |       | 6.736 | 2.316 |
| 8.199 | 2.688 |       |       | 6.751 | 2.423 |
| 8.230 | 2.721 |       |       | 6.762 | 2.492 |
| 8.254 | 2.750 |       |       | 6.772 | 2.575 |
| 8.270 | 2.774 |       |       | 6.780 | 2.637 |
|       |       |       |       | 6.793 | 2.737 |
|       |       |       |       | 6.809 | 2.828 |
|       |       |       |       | 6.820 | 2.906 |
|       |       |       |       | 6.841 | 2.992 |
|       |       |       |       | 6.879 | 3.041 |
|       |       |       |       | 6.935 | 3.126 |
|       |       |       |       | 7.025 | 3.186 |
|       |       |       |       | 7.136 | 3.261 |
|       |       |       |       | 7.264 | 3.310 |
|       |       |       |       | 7.387 | 3.384 |
|       |       |       |       | 7.500 | 3.436 |
|       |       |       |       | 7.613 | 3.495 |
|       |       |       |       | 7.724 | 3.511 |
|       |       |       |       | 7.823 | 3.557 |
|       |       |       |       | 7.926 | 3.607 |
|       |       |       |       | 8.010 | 3.644 |
|       |       |       |       | 8.082 | 3.685 |

|  |  |  |  |       |       |
|--|--|--|--|-------|-------|
|  |  |  |  | 8.152 | 3.745 |
|--|--|--|--|-------|-------|

**Table S22.** Experimentally measured values of pressure and mass during desorption of Propane in MCM-41 at +20°C.

| 60 Å     |       | 80 Å     |       | 100 Å    |       |
|----------|-------|----------|-------|----------|-------|
| Pressure | Mass  | Pressure | Mass  | Pressure | Mass  |
| (bar)    | (g)   | (bar)    | (g)   | (bar)    | (g)   |
| 8.284    | 2.857 | 8.227    | 2.932 | 8.208    | 3.793 |
| 7.926    | 2.603 | 7.896    | 2.503 | 7.814    | 3.579 |
| 6.824    | 2.424 | 7.286    | 2.332 | 7.338    | 3.378 |
| 5.989    | 2.253 | 6.794    | 2.245 | 6.932    | 3.177 |
| 5.802    | 2.050 | 6.600    | 1.988 | 6.764    | 3.001 |
| 5.657    | 1.854 | 6.511    | 1.757 | 6.706    | 2.788 |
| 5.437    | 1.698 | 6.447    | 1.530 | 6.669    | 2.591 |
| 5.053    | 1.543 | 6.391    | 1.450 | 6.639    | 2.386 |
| 4.573    | 1.391 | 6.251    | 1.077 | 6.603    | 2.189 |
| 4.079    | 1.287 | 5.969    | 0.878 | 6.554    | 1.995 |
| 3.629    | 1.189 | 5.576    | 0.702 | 6.290    | 1.846 |
| 3.226    | 1.090 | 5.152    | 0.612 | 5.939    | 1.654 |
| 2.540    | 0.980 | 4.726    | 0.526 | 5.543    | 1.524 |
| 2.261    | 0.882 | 4.303    | 0.392 | 5.130    | 1.394 |
| 2.019    | 0.815 | 3.162    | 0.243 | 4.716    | 1.271 |
| 1.808    | 0.761 |          |       | 4.314    | 1.139 |
| 1.623    | 0.744 |          |       | 3.908    | 1.035 |
| 1.323    | 0.652 |          |       | 3.544    | 0.949 |
| 1.201    | 0.618 |          |       | 3.211    | 0.873 |
| 1.094    | 0.608 |          |       | 2.907    | 0.807 |
| 1.000    | 0.571 |          |       | 2.630    | 0.759 |
| 0.920    | 0.551 |          |       | 2.156    | 0.650 |
| 0.847    | 0.522 |          |       | 1.611    | 0.516 |
| 0.721    | 0.461 |          |       | 1.029    | 0.318 |
|          |       |          |       | 0.736    | 0.234 |
|          |       |          |       | 0.680    | 0.228 |
|          |       |          |       | 0.582    | 0.182 |
